# Supplementary material for: Epidemiology and Burden of Sepsis at Thailand’s Largest University-Based National Tertiary Referral Center during 2019
Source: MDPI journal article supplement (doi:10.3390/antibiotics11070899), 2022-07-05
Supplement: s1 [file s1]

**Table S1.** Type, frequency, and percentage of 602 causative pathogens detected from 435 patients with infection

| Type of pathogen                    | n (%)             |
|-------------------------------------|-------------------|
| <b>Bacteria</b>                     | <b>532 (88.4)</b> |
| <b>Gram positive bacteria</b>       | 141 (23.4)        |
| <i>Staphylococcus aureus</i>        | 55 (9.1)          |
| <i>Enterococcus faecium</i>         | 19 (3.2)          |
| Coagulase-negative staphylococci    | 15 (2.5)          |
| <i>Enterococcus faecalis</i>        | 14 (2.3)          |
| <i>Streptococcus agalactiae</i>     | 9 (1.5)           |
| Alpha-hemolytic streptococci        | 6 (1.0)           |
| <i>Streptococcus pneumoniae</i>     | 4 (0.7)           |
| Beta-hemolytic streptococci         | 4 (0.7)           |
| <i>Bacillus</i> spp                 | 2 (0.3)           |
| <i>Nocardia</i> spp.                | 2 (0.3)           |
| Coryneform bacteria                 | 2 (0.3)           |
| <i>Streptococcus pyogenes</i>       | 1 (0.2)           |
| <i>Streptococcus infantarius</i>    | 1 (0.2)           |
| <i>Streptococcus pasteurianus</i>   | 1 (0.2)           |
| <i>Enterococcus</i> spp.            | 1 (0.2)           |
| <i>Enterococcus casseliflavus</i>   | 1 (0.2)           |
| <i>Lactococcus</i> spp.             | 1 (0.2)           |
| <i>Listeria monocytogenes</i>       | 1 (0.2)           |
| <i>Corynebacterium</i> spp.         | 1 (0.2)           |
| <i>Rothia</i> spp.                  | 1 (0.2)           |
| <b>Gram negative bacteria</b>       | 374 (62.1)        |
| <i>Escherichia coli</i>             | 104 (17.3)        |
| <i>Klebsiella pneumoniae</i>        | 74 (12.3)         |
| <i>Pseudomonas aeruginosa</i>       | 61 (10.1)         |
| <i>Acinetobacter baumannii</i>      | 60 (10.0)         |
| <i>Stenotrophomonas maltophilia</i> | 23 (3.8)          |
| <i>Enterobacter</i> spp.            | 11 (1.8)          |
| <i>Proteus</i> spp.                 | 8 (1.3)           |
| <i>Moraxella</i> spp.               | 5 (0.8)           |

|                                           |                    |
|-------------------------------------------|--------------------|
| <i>Citrobacter</i> spp.                   | 5 (0.8)            |
| <i>Salmonella</i> spp.                    | 4 (0.7)            |
| <i>Burkholderia cepacia</i>               | 3 (0.5)            |
| <i>Aeromonas</i> spp.                     | 2 (0.3)            |
| <i>Treponema pallidum</i>                 | 2 (0.3)            |
| <i>Fusobacterium</i> spp.                 | 2 (0.3)            |
| <i>Haemophilus influenzae</i>             | 2 (0.3)            |
| <i>Burkholderia pseudomallei</i>          | 2 (0.3)            |
| <i>Legionella</i> spp.                    | 1 (0.2)            |
| <i>Klebsiella aerogenes</i>               | 1 (0.2)            |
| <i>Helicobacter</i> spp.                  | 1 (0.2)            |
| <i>Morganella morganii</i>                | 1 (0.2)            |
| <i>Brucella</i> spp.                      | 1 (0.2)            |
| <i>Cronobacter sakazakii</i>              | 1 (0.2)            |
| <b>Mycobacteria</b>                       | 17 (2.8)           |
| <i>Mycobacterium tuberculosis</i> complex | 14 (2.3)           |
| Non-tuberculous mycobacteria              | 3 (0.5)            |
| <b>Fungi</b>                              | <b>40 (6.6)</b>    |
| <i>Candida</i> spp.                       | 22 (3.7)           |
| <i>Aspergillus</i> spp.                   | 15 (2.5)           |
| <i>Cryptococcus</i> spp.                  | 1 (0.2)            |
| <i>Pneumocystis jirovecii</i>             | 1 (0.2)            |
| <i>Trichosporon</i> spp.                  | 1 (0.2)            |
| <b>Virus</b>                              | <b>30 (5.0)</b>    |
| Influenza/Respiratory syncytial virus     | 15 (2.5)           |
| Dengue virus                              | 5 (0.8)            |
| Cytomegalovirus                           | 4 (0.7)            |
| Parainfluenza virus                       | 2 (0.3)            |
| Human metapneumovirus                     | 2 (0.2)            |
| Chikungunya virus                         | 1 (0.2)            |
| Adenovirus                                | 1 (0.2)            |
| <b>Total causative pathogens detected</b> | <b>602 (100.0)</b> |
