# Supplementary figures and images for: Epidemiology and Burden of Sepsis at Thailand’s Largest University-Based National Tertiary Referral Center during 2019
Source: MDPI journal article supplement (doi:10.3390/antibiotics11070899), 2022-07-05

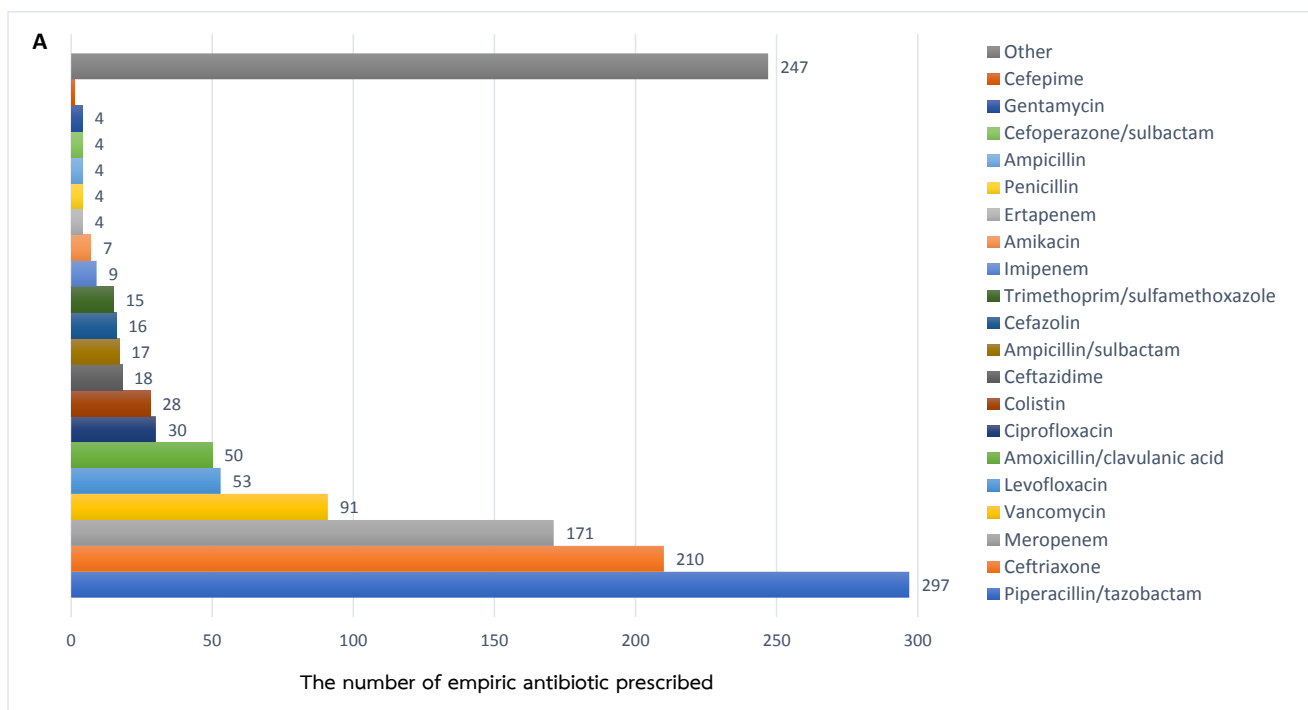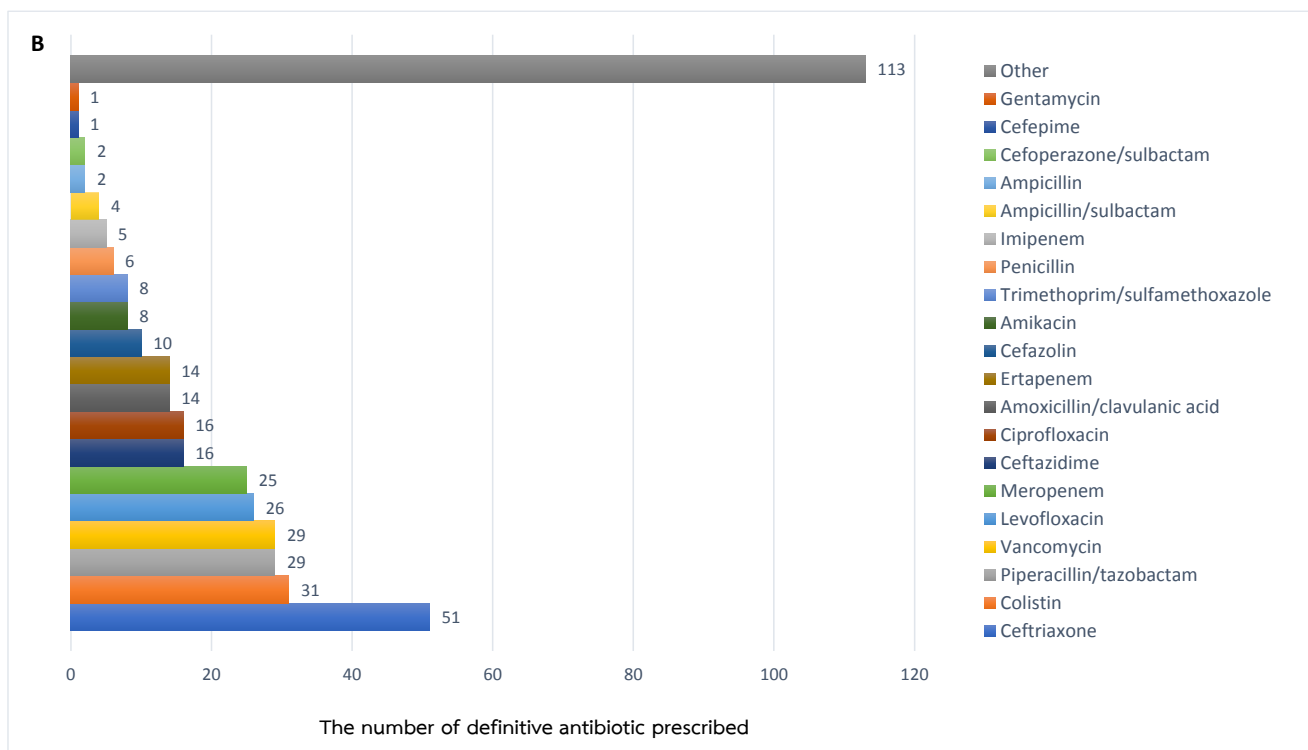

Supplement: s1 [file s1]
